# Supplementary material
Source: JCI journal article supplement (doi:10.1172/jci95512)
Supplement: sd1 [file 1]

**SUPPLEMENTARY FIGURES FOR**

**Increased Ca<sup>2+</sup> signaling through Cav1.2 L-type Ca<sup>2+</sup> channels promotes bone formation and prevents estrogen deficiency-induced bone loss**

Chike Cao<sup>1</sup>, Yinshi Ren<sup>2</sup>, Adam S. Barnett<sup>1</sup>, Anthony J. Miranda<sup>2</sup>, Douglas Rouse<sup>4</sup>, Se Hwan Mun<sup>5</sup>, Kyung-Hyun Park-Min<sup>5</sup>, Amy L. McNulty<sup>2</sup>, Farshid Guilak<sup>6</sup>, Courtney M. Karner<sup>2,3</sup>, Matthew J. Hilton<sup>2,3,\*</sup>, Geoffrey S. Pitt<sup>1,7,\*</sup>

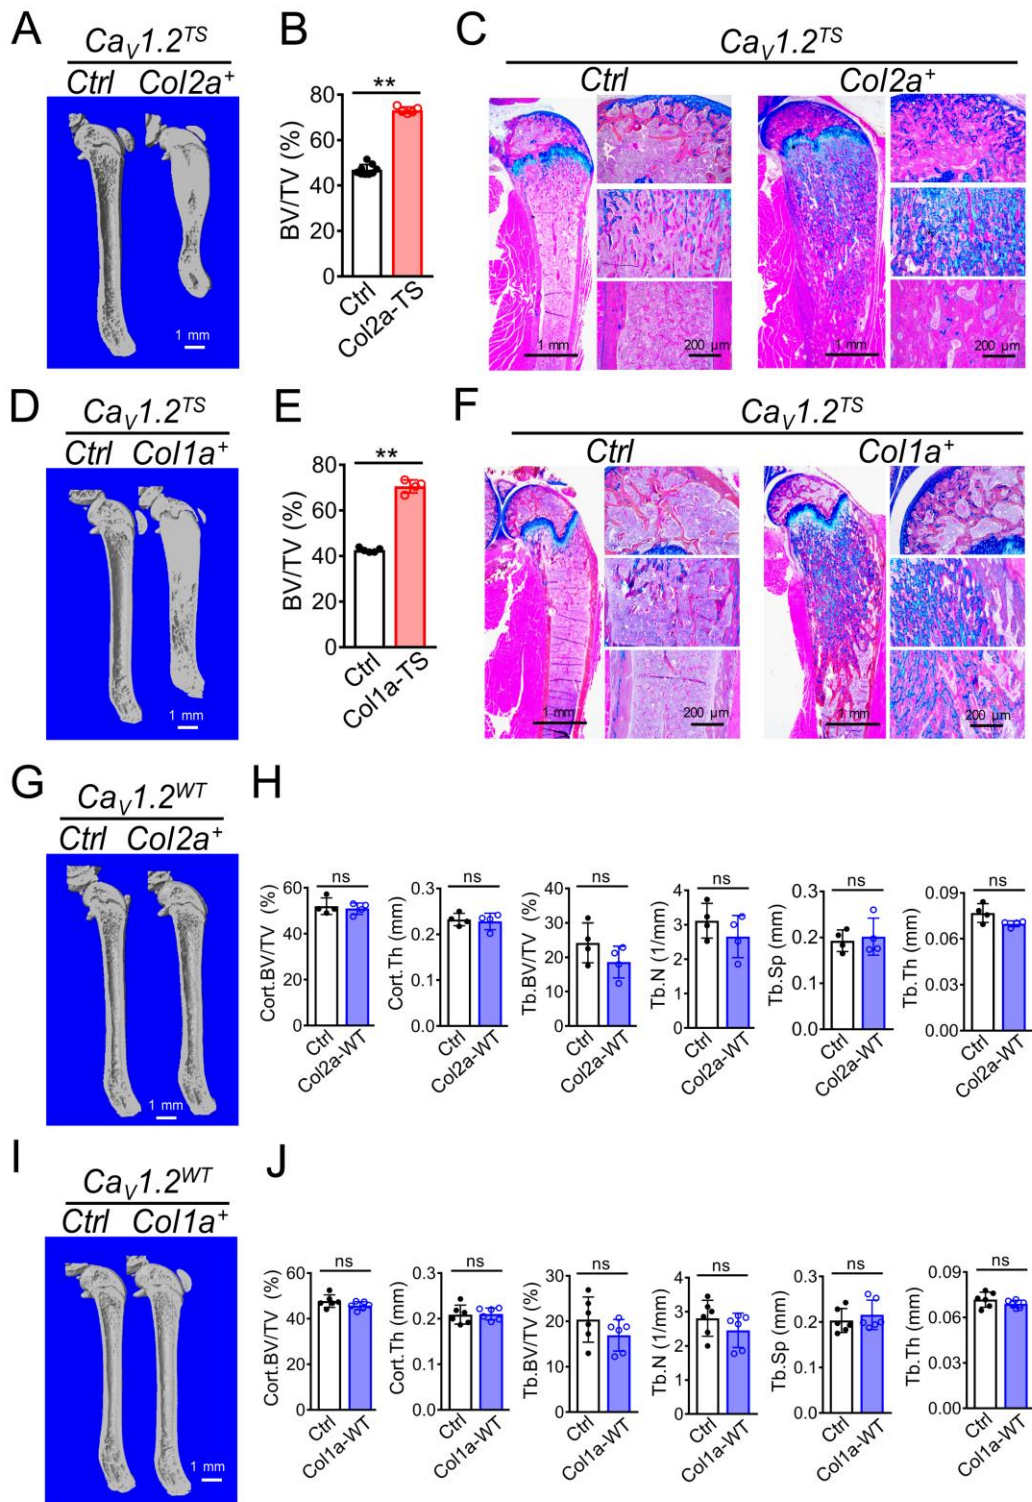

Supplementary Figure 1. Figure legend on the following page.

**Supplementary Figure 1. Expression of the  $Ca_v1.2^{TS}$  channel driven by  $Col2a-Cre$  or  $Col1a1-Cre$  increases bone mass *in vivo*.** (A)  $\mu$ CT 3D reconstruction images of the femurs of 6-week-old control ( $Cre^-;Ca_v1.2^{TS}$ ) and mutant ( $Col2a1-Cre;Ca_v1.2^{TS}$ ) littermate mice with Skyscan 1176 (Skyscan, Kontich, Belgium) set to 55 kVp and 455  $\mu$ A, and voxel size 17.7  $\mu$ m. (B)  $\mu$ CT 3D analysis of control ( $Cre^-;Ca_v1.2^{TS}$ ) and mutant ( $Col2a1-Cre;Ca_v1.2^{TS}$ ) obtained from 470 slices (17.7  $\mu$ m thickness, 8.3 mm total) from the distal femur. Bar values are means  $\pm$  SD ( $n \geq 4$ ). \*\*,  $P < 0.01$ ). (C) ABH/OG staining of longitudinal femur sections from 6-week-old  $Cre^-Ca_v1.2^{TS}$  and  $Col2a1-Cre;Ca_v1.2^{TS}$  littermate mice at left with 1.25 x magnification. Shown to the right of the main images are 10 x magnifications of secondary ossification center, primary spongiosa, and marrow region. (D)  $\mu$ CT 3D reconstruction images of the femurs of 6-week-old control ( $Cre^-;Ca_v1.2^{TS}$ ) and mutant ( $Col1a1-Cre;Ca_v1.2^{TS}$ ) littermate mice as in (A). (E)  $\mu$ CT 3D analysis from the distal femur of  $Cre^-Ca_v1.2^{TS}$  and  $Col2a1-Cre;Ca_v1.2^{TS}$  littermate mice performed as in (B). Bar values are means  $\pm$  SD ( $n \geq 4$ ). \*\*,  $P < 0.01$ ). (F) ABH/OG staining of longitudinal femur sections from 6-week-old as in (C). (G)  $\mu$ CT 3D reconstruction images of the femurs of 6-week-old control ( $Cre^-;Ca_v1.2^{WT}$ ) and  $Cre-Col2a1;Ca_v1.2^{WT}$  littermate mice. (H)  $\mu$ CT 3D analysis obtained from 50 slices (17.7  $\mu$ m thickness, 0.885 mm total) immediately below the growth plate for trabecular bone analysis and from 50 slices (17.7  $\mu$ m thickness 0.885 mm total) in the mid shaft for cortical bone analysis for  $Cre^-;Ca_v1.2^{WT}$  and  $Cre-Col2a1;Ca_v1.2^{WT}$  littermate mice. Bar values are means  $\pm$  SD ( $n = 4$ ). ns, not significant). (I)  $\mu$ CT 3D reconstruction images of the femurs of 6-week-old control ( $Cre^-;Ca_v1.2^{WT}$ ) and  $Cre-Col1a1;Ca_v1.2^{WT}$  littermate mice. (J)  $\mu$ CT 3D analysis as in (H) for  $Cre^-;Ca_v1.2^{WT}$  and  $Cre-Col1a1;Ca_v1.2^{WT}$  littermate mice. Bar values are means  $\pm$  SD ( $n = 6$ ). ns, not significant). Statistical analysis was performed by two-tailed unpaired *t* test.

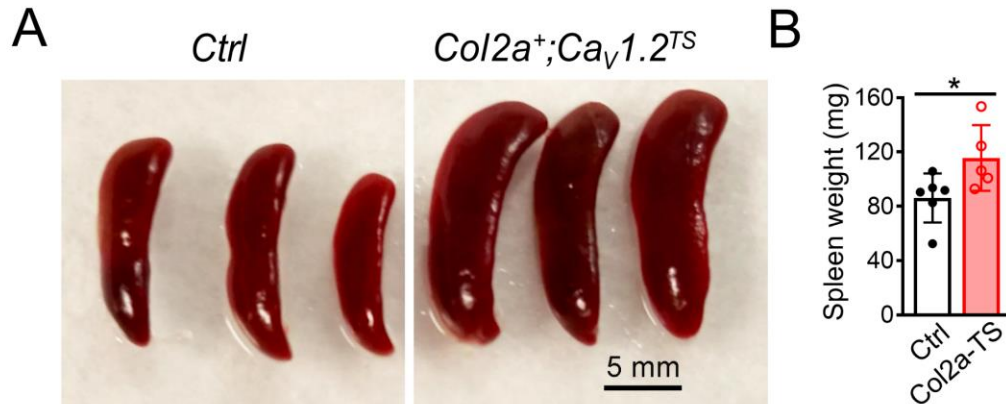

**Supplementary Figure 2. Splenomegaly in  $Ca_v1.2^{TS}$ -expressing mice.** (A) Whole-mount images of isolated spleens from eight-month-old control ( $Cre;Ca_v1.2^{TS}$ ) and  $Col2a-Cre;Ca_v1.2^{TS}$  littermate mice. (B) Quantification of spleen weight (mg) from eight-month-old littermates. Bar values are means  $\pm$  SD ( $n \geq 5$ , \*,  $P < 0.01$ ). Statistical analysis was performed by two-tailed unpaired  $t$  test.

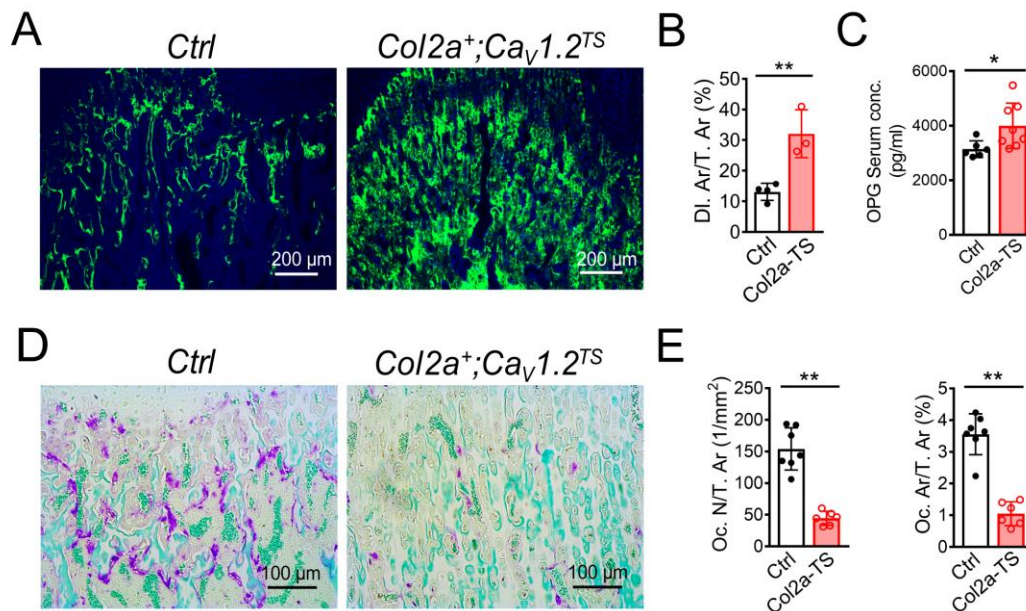

**Supplementary Figure 3 Expression of  $Ca_V1.2^{TS}$  channel driven by  $Col2a$ -Cre promotes osteoblast formation and inhibits osteoclast differentiation.** (A) Representative images of calcein double labeling in femurs from 6-week-old control ( $Cre^-;Ca_V1.2^{TS}$ ) and  $Col2a1-Cre;Ca_V1.2^{TS}$  littermate mice. (B) Analysis of the percentage of double labeling area over tissue area underneath the growth plate (DI. Ar/T. Ar). Bar values are means  $\pm$  SD ( $n \geq 3$ . \*\*,  $P < 0.01$ ). (C) Serum OPG levels of control ( $Cre^-;Ca_V1.2^{TS}$ ) and  $Col2a1-Cre;Ca_V1.2^{TS}$  littermate mice at 6 weeks old. Bar values are means  $\pm$  SD ( $n \geq 6$ . \*,  $P < 0.05$ ). (D) Representative TRAP staining images of femur sections from 6-week-old control ( $Cre^-;Ca_V1.2^{TS}$ ) and  $Col2a1-Cre;Ca_V1.2^{TS}$  littermate mice. (E) Analysis of osteoclast number (Oc.N) or osteoclast area (Oc. Ar) over tissue area (T. Ar) underneath the growth plate. Bar values are means  $\pm$  SD ( $n \geq 6$ . \*\*,  $P < 0.01$ ). Statistical analysis was performed by two-tailed unpaired  $t$  test.

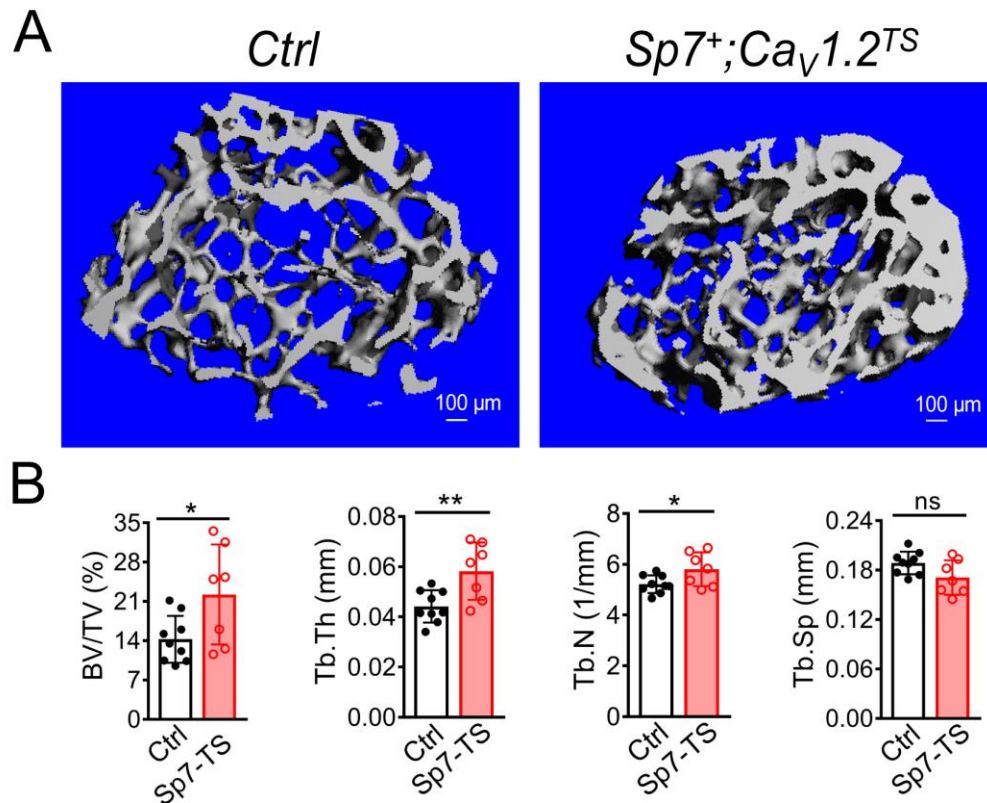

**Supplementary Figure 4.  $Ca_v1.2^{TS}$  enhances bone accrual in postnatal mice.** (A)  $\mu$ CT 3D reconstruction images of metaphysis of distal femurs and (B)  $\mu$ CT analysis of BV/TV, Tb.Th, Tb.N and Tb.Sp in control ( $Cre^{-/-};Ca_v1.2^{TS}$ ) versus  $Sp7-Cre;Ca_v1.2^{TS}$ . Data were obtained in 14 week-old male mice, 8 weeks after activating  $Sp7-Cre$  by removing doxycycline food. Bar values are means  $\pm$  SD ( $n \geq 7$ ). \*,  $P < 0.05$ ). Statistical analysis was performed by two-tailed unpaired  $t$  test.

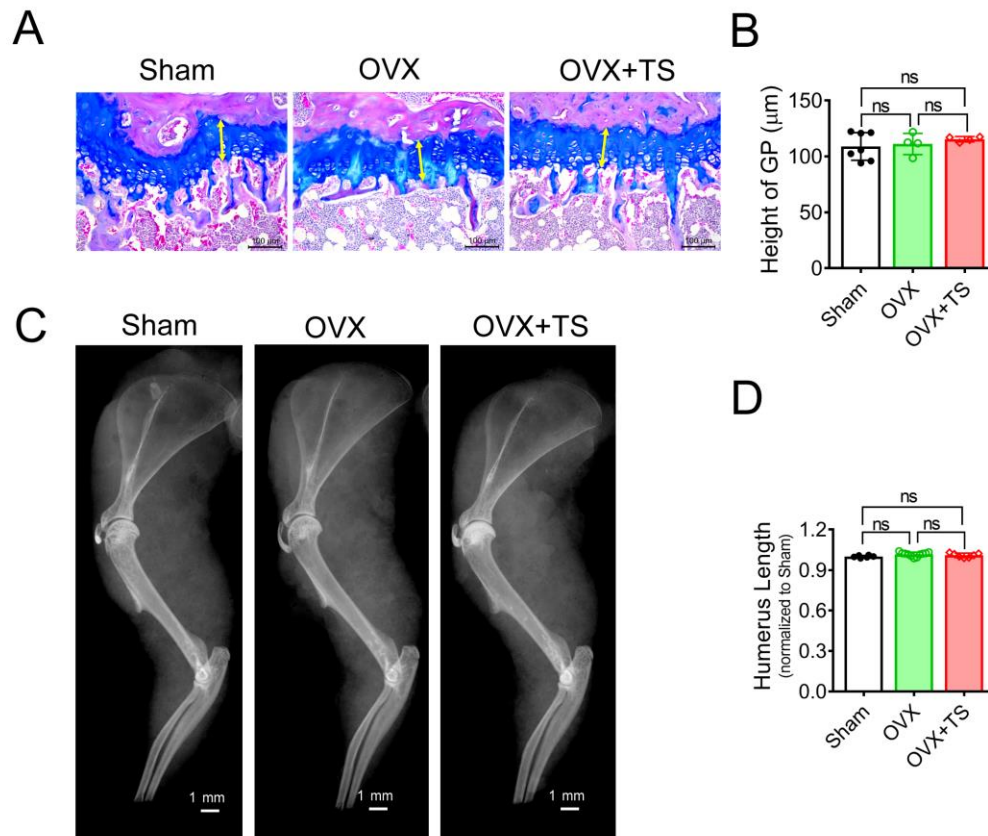

**Supplementary Figure 5: No effect on growth plate and the bone longitudinal growth with  $\text{Ca}_v1.2^{\text{TS}}$  expression driven by  $\text{Sp7 Cre}$  and estrogen deficiency at the age of 2 months old.** (A) Alcian blue hematoxylin/Orange G (ABHOG) staining of femur section and (B) quantification of the height of growth plate (GP) from mice 8 weeks after sham surgery, OVX and OVX with  $\text{Ca}_v1.2^{\text{TS}}$  expression ( $\text{Sp7-Cre}^+; \text{Ca}_v1.2^{\text{TS}}$ ). Bar values are means  $\pm$  SD ( $n \geq 4$ ; ns, no significance). (C) Radiographs of the forelimbs and (D) Humerus length of mice 8 weeks after sham surgery, OVX and OVX with  $\text{Ca}_v1.2^{\text{TS}}$  expression ( $\text{Sp7-Cre}^+; \text{Ca}_v1.2^{\text{TS}}$ ). Bar values are means  $\pm$  SD ( $n \geq 6$ ; ns, no significance). Statistical analysis was performed by one-way ANOVA followed by Tukey's post-test analysis and a  $P$  value less than 0.05 was considered significant.
